# Supplementary material for: Timing of Major Postoperative Bleeding Among Patients Undergoing Surgery
Source: PubMed Central journal article supplement (PMC10988355; doi:10.1001/jamanetworkopen.2024.4581), 2024-04-02
Supplement: jamanetwopen-e244581-s001.pdf [file jamanetwopen-e244581-s001.pdf]

## Supplemental Online Content

Halme ALE, Roshanov PS, Tornberg SV, Lavikainen LI, Devereaux PJ, Tikkinen KAO; VISION Investigators. Timing of major postoperative bleeding among patients undergoing surgery. *JAMA Netw Open*. 2024;7(4):e244581.  
doi:10.1001/jamanetworkopen.2024.4581

**eFigure 1.** Absolute Risk of BIMS, Postoperative Red Blood Cell Transfusion, Postoperative Hemoglobin < 70 and Bleeding Associated With Reintervention on Each Postoperative Day up to Day 30

**eFigure 2.** Absolute Risk of Major Bleeding on Each Postoperative Day up to Day 30

**eFigure 3.** Sensitivity Analysis of Cumulative Proportion of Risk for Major Bleeding by Patient Recruitment Year

**eFigure 4.** Sensitivity Analysis of Cumulative Proportion of Risk for Major Bleeding by Surgical Specialty

**eTable 1.** Cumulative Proportion of Risk (%) of Events up to Postoperative Day 30

**eTable 2.** Confidence Intervals for Outcomes

**eTable 3.** Results of the Secondary Analysis for Late vs Early Postoperative Major Bleeding

This supplemental material has been provided by the authors to give readers additional information about their work.

**eFigure 1.** Absolute Risk of BIMS, Postoperative Red Blood Cell Transfusion, Postoperative Hemoglobin < 70 and Bleeding Associated With Reintervention on Each Postoperative Day up to Day 30

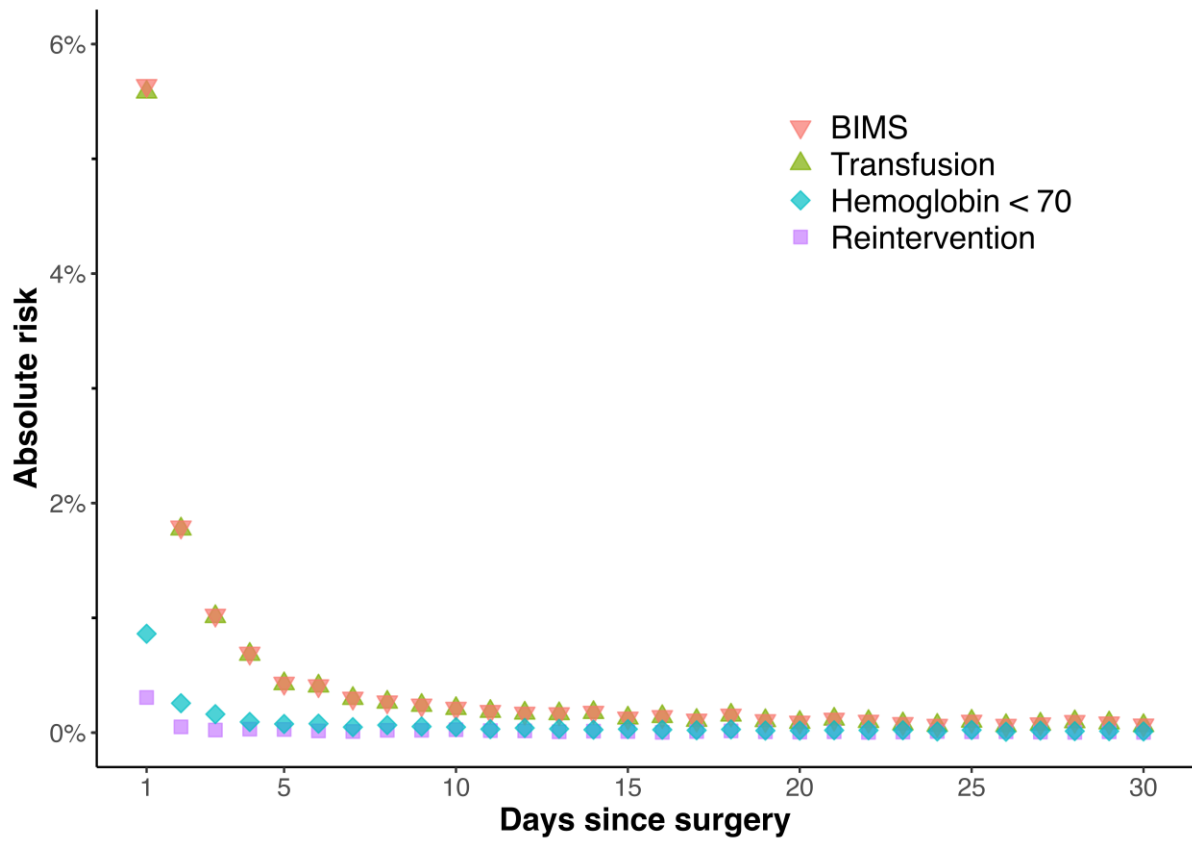

BIMS (Bleeding Independently associated with Mortality after noncardiac Surgery) is defined as a composite of postoperative transfusion, postoperative hemoglobin < 70 and bleeding associated with reintervention.

**eFigure 2.** Absolute Risk of Major Bleeding on Each Postoperative Day up to Day 30

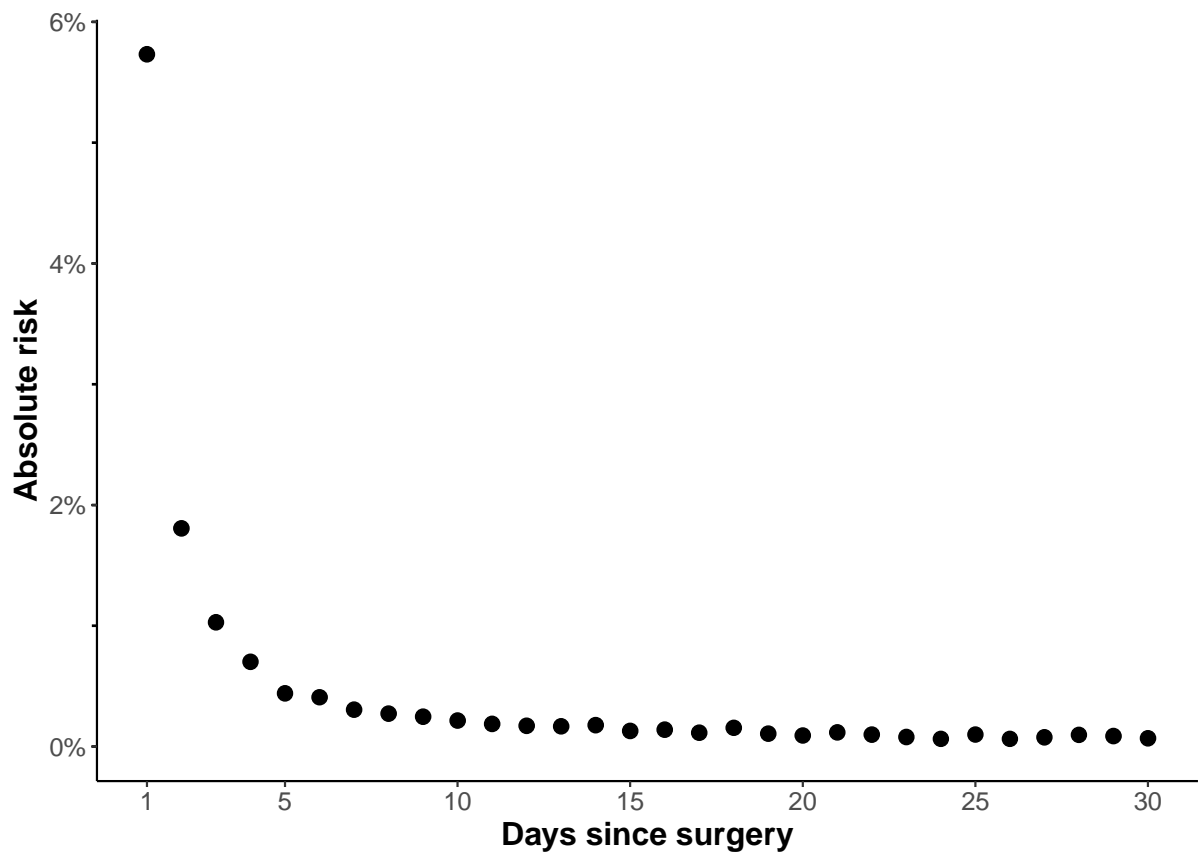

**eFigure 3.** Sensitivity Analysis of Cumulative Proportion of Risk for Major Bleeding by Patient Recruitment Year

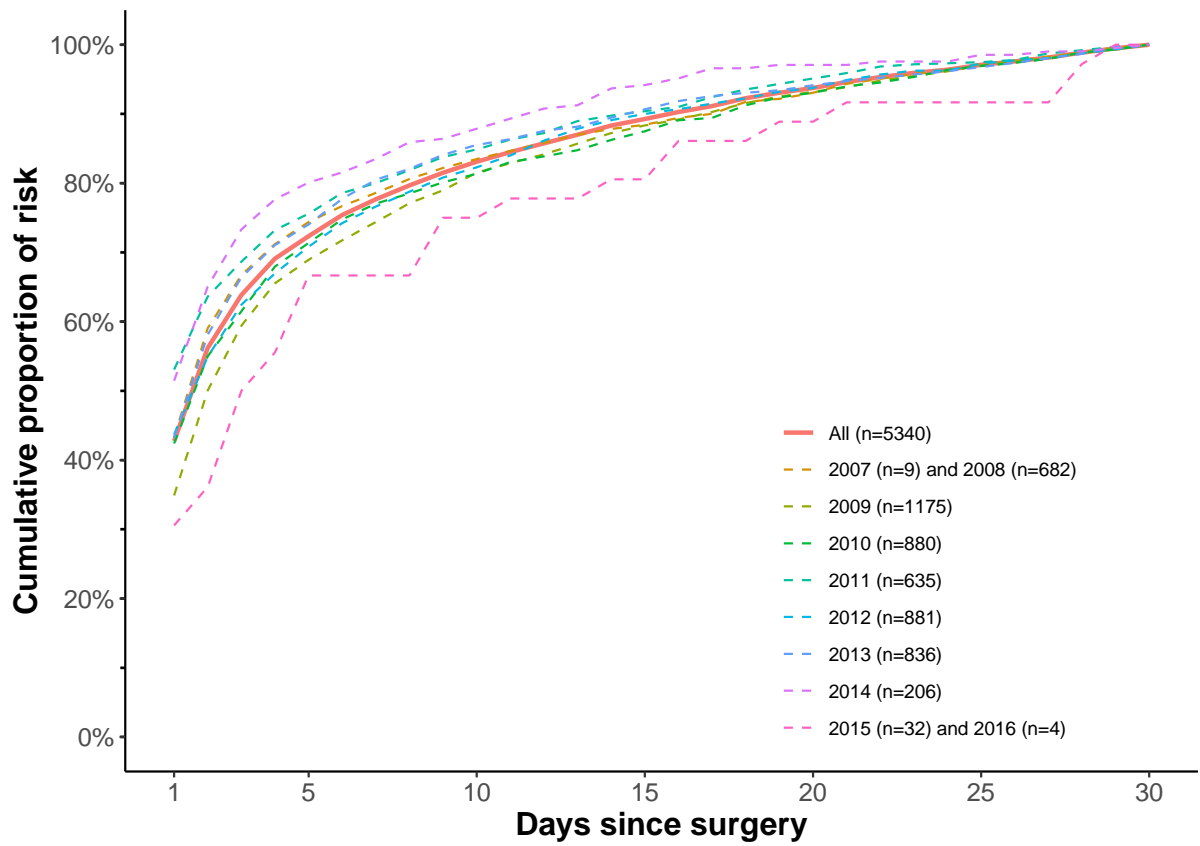

**eFigure 4.** Sensitivity Analysis of Cumulative Proportion of Risk for Major Bleeding by Surgical Specialty

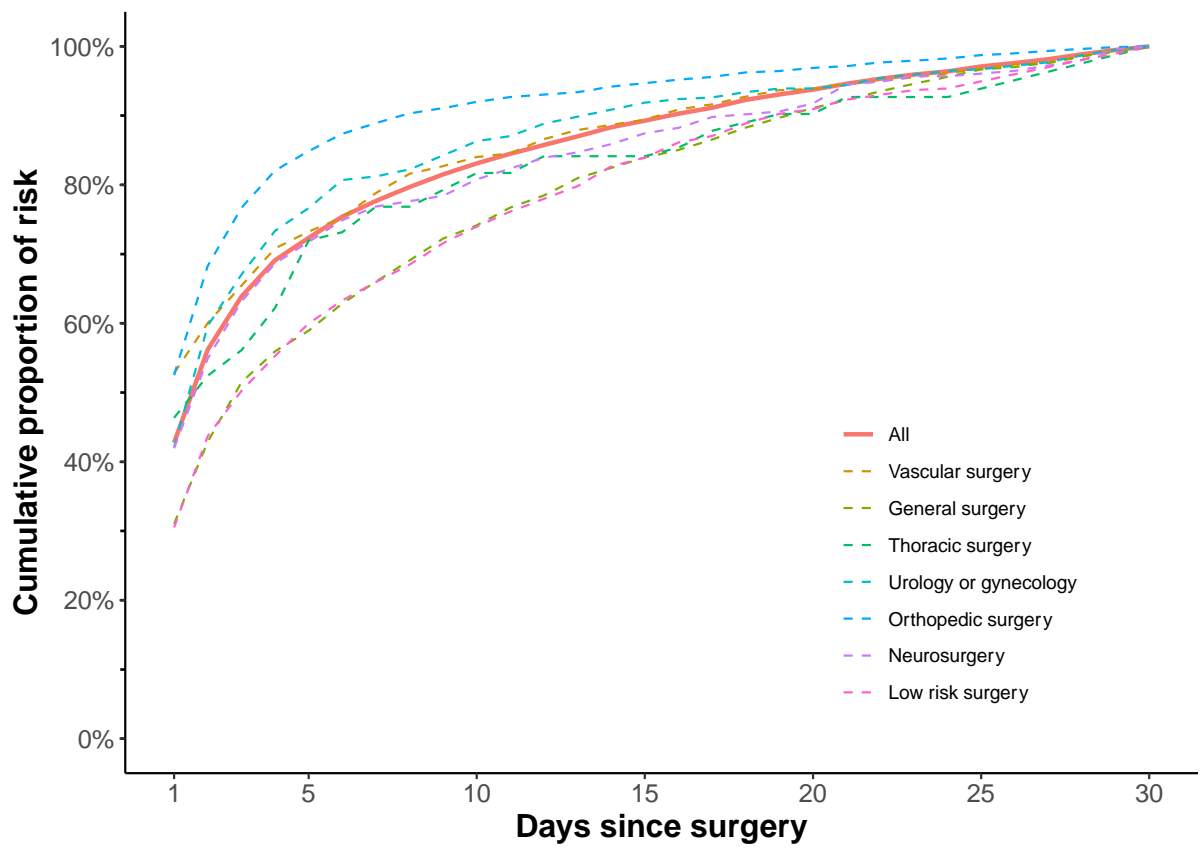

**eTable 1. Cumulative Proportion of Risk (%) of Events up to Postoperative Day 30**

|                 | 1 d  | 2 d  | 3 d  | 4 d  | 5 d  | 6 d  | 7 d  | 14 d | 21 d | 30 d |
|-----------------|------|------|------|------|------|------|------|------|------|------|
| Major bleeding* | 42.7 | 56.2 | 63.9 | 69.1 | 72.4 | 75.4 | 77.7 | 88.3 | 94.6 | 100  |
| BIMS            | 42.6 | 56.1 | 63.9 | 69.1 | 72.3 | 75.4 | 77.7 | 88.3 | 94.6 | 100  |
| Transfusion     | 42.6 | 56.2 | 63.9 | 69.1 | 72.3 | 75.4 | 77.7 | 88.3 | 94.6 | 100  |
| Hg < 70         | 39.9 | 51.8 | 59.3 | 63.6 | 67.1 | 70.7 | 72.9 | 86.5 | 93.8 | 100  |
| Reintervention  | 44.5 | 51.8 | 55.1 | 59.5 | 63.5 | 65.7 | 67.2 | 84.3 | 92.7 | 100  |
| Death**         | 32.0 | 36.0 | 40.0 | 44.0 | 48.0 | 52.0 | 56.0 | 88.0 | 92.0 | 100  |

\*A composite of BIMS and bleeding associated with reintervention

\*\*Very low number of events (n=25)

**eTable 2.** Confidence Intervals for Outcomes

| Post-operative day    | Lower limit (95% CI) | Risk* (%) | Upper limit (95% CI) |
|-----------------------|----------------------|-----------|----------------------|
| <b>Major bleeding</b> |                      |           |                      |
| 1                     | 40.9                 | 42.7      | 44.6                 |
| 2                     | 54.3                 | 56.2      | 58.1                 |
| 3                     | 62.0                 | 63.9      | 65.7                 |
| 4                     | 67.2                 | 69.1      | 70.9                 |
| 5                     | 70.5                 | 72.4      | 74.2                 |
| 6                     | 73.5                 | 75.4      | 77.3                 |
| 7                     | 75.8                 | 77.7      | 79.5                 |
| 14                    | 86.5                 | 88.3      | 90.2                 |
| 21                    | 92.7                 | 94.6      | 96.5                 |
| 30                    |                      | 100       |                      |
| <b>BIMS</b>           |                      |           |                      |
| 1                     | 40.7                 | 42.6      | 44.5                 |
| 2                     | 53.4                 | 56.1      | 58.0                 |
| 3                     | 62.0                 | 63.9      | 65.7                 |
| 4                     | 67.2                 | 69.1      | 71.0                 |
| 5                     | 70.5                 | 72.3      | 74.2                 |
| 6                     | 73.5                 | 75.4      | 77.3                 |
| 7                     | 75.8                 | 77.7      | 79.5                 |
| 14                    | 86.4                 | 88.3      | 90.2                 |
| 21                    | 92.7                 | 94.6      | 96.4                 |
| 30                    |                      | 100       |                      |
| <b>Transfusion</b>    |                      |           |                      |
| 1                     | 40.7                 | 42.6      | 44.5                 |
| 2                     | 54.3                 | 56.2      | 58.0                 |
| 3                     | 62.0                 | 63.9      | 65.8                 |
| 4                     | 67.2                 | 69.1      | 71.0                 |
| 5                     | 70.4                 | 72.3      | 74.2                 |
| 6                     | 73.5                 | 75.4      | 77.3                 |
| 7                     | 75.8                 | 77.7      | 79.6                 |
| 14                    | 86.5                 | 88.3      | 90.2                 |
| 21                    | 92.8                 | 94.6      | 96.5                 |
| 30                    |                      | 100       |                      |
| <b>Hg &lt; 70</b>     |                      |           |                      |
| 1                     | 35.3                 | 39.9      | 44.6                 |
| 2                     | 47.2                 | 51.8      | 56.4                 |
| 3                     | 54.6                 | 59.3      | 63.9                 |
| 4                     | 58.9                 | 63.6      | 68.2                 |
| 5                     | 62.4                 | 67.1      | 71.7                 |
| 6                     | 66.0                 | 70.7      | 75.3                 |
| 7                     | 68.2                 | 72.9      | 77.5                 |
| 14                    | 81.9                 | 86.5      | 91.1                 |
| 21                    | 89.2                 | 93.8      | 98.5                 |
| 30                    |                      | 100       |                      |
| <b>Reintervention</b> |                      |           |                      |
| 1                     | 36.3                 | 44.5      | 52.7                 |
| 2                     | 43.6                 | 51.8      | 60.0                 |
| 3                     | 46.9                 | 55.1      | 63.3                 |
| 4                     | 51.3                 | 59.5      | 67.7                 |
| 5                     | 55.3                 | 63.5      | 71.7                 |
| 6                     | 57.5                 | 65.7      | 73.9                 |
| 7                     | 58.9                 | 67.2      | 75.4                 |
| 14                    | 76.1                 | 84.3      | 92.5                 |
| 21                    | 84.5                 | 92.7      | 100                  |
| 30                    |                      | 100       |                      |

| <b>Death</b> |      |     |      |
|--------------|------|-----|------|
| 1            | 4.8  | 32  | 59.2 |
| 2            | 8.8  | 36  | 63.2 |
| 3            | 12.8 | 40  | 67.2 |
| 4            | 16.8 | 44  | 71.2 |
| 5            | 20.8 | 48  | 75.2 |
| 6            | 24.8 | 52  | 79.2 |
| 7            | 28.8 | 56  | 83.2 |
| 14           | 60.8 | 88  | 100  |
| 21           | 72.8 | 92  | 100  |
| 30           |      | 100 |      |

\*Cumulative proportion of risk of the event



**eTable 3.** Results of the Secondary Analysis for Late vs Early Postoperative Major Bleeding

Early bleeding is defined as BIMS or reintervention within the first 2 postoperative days (1) and late as BIMS or reintervention after the first 2 postoperative days (0).

| Characteristic                 | OR <sup>1</sup> | 95% CI <sup>1</sup> | p-value |
|--------------------------------|-----------------|---------------------|---------|
| Female                         | 1.49            | 1.28, 1.74          | <0.001  |
| <b>Age</b>                     |                 |                     |         |
| 45 - 64                        | —               | —                   |         |
| 65 - 79                        | 0.90            | 0.77, 1.07          | 0.2     |
| 80+                            | 0.87            | 0.69, 1.09          | 0.2     |
| <b>BMI</b>                     |                 |                     |         |
| 18.5 - 24.9                    | —               | —                   |         |
| < 18.5                         | 0.76            | 0.57, 1.02          | 0.067   |
| 25 - 29.9                      | 0.95            | 0.80, 1.13          | 0.6     |
| 30+                            | 0.81            | 0.66, 0.99          | 0.040   |
| <b>Preoperative hemoglobin</b> |                 |                     |         |
| >= 130                         | —               | —                   |         |
| 120-130                        | 1.13            | 0.91, 1.41          | 0.3     |
| 110-120                        | 1.13            | 0.91, 1.41          | 0.3     |
| 100-110                        | 1.13            | 0.89, 1.43          | 0.3     |

| Characteristic                        | OR <sup>†</sup> | 95% CI <sup>†</sup> | p-value |
|---------------------------------------|-----------------|---------------------|---------|
| 90-100                                | 1.07            | 0.83, 1.38          | 0.6     |
| 80-90                                 | 1.41            | 1.00, 1.99          | 0.048   |
| 70-80                                 | 1.39            | 0.75, 2.58          | 0.3     |
| <70                                   | 1.16            | 0.45, 3.06          | 0.8     |
| Tobacco use within 6 months           | 1.02            | 0.82, 1.26          | 0.9     |
| <b>GFR</b>                            |                 |                     |         |
| >=90                                  | —               | —                   |         |
| 60-89                                 | 0.89            | 0.72, 1.11          | 0.3     |
| 30-59                                 | 0.88            | 0.67, 1.17          | 0.4     |
| 15-29                                 | 0.80            | 0.49, 1.31          | 0.4     |
| <15 or dialysis                       | 0.68            | 0.41, 1.12          | 0.13    |
| NSAID/COX-2-inhibitor <24h            | 1.00            | 0.75, 1.34          | >0.9    |
| NSAID/COX-2-inhibitor 7d to >24h      | 0.97            | 0.75, 1.26          | 0.8     |
| ASA, Ticlopidine or Plavix 1d         | 1.20            | 0.84, 1.72          | 0.3     |
| ASA, Ticlopidine or Plavix 7d to >24h | 0.90            | 0.71, 1.15          | 0.4     |
| Statin <24h                           | 0.88            | 0.64, 1.20          | 0.4     |
| Statin 7d to >24h                     | 1.06            | 0.80, 1.43          | 0.7     |

| Characteristic                                                   | OR <sup>†</sup> | 95% CI <sup>†</sup> | p-value |
|------------------------------------------------------------------|-----------------|---------------------|---------|
| Prophylactic SC AA <24h                                          | 1.04            | 0.81, 1.32          | 0.8     |
| Prophylactic SC AA 7d to >24h                                    | 0.66            | 0.49, 0.90          | 0.007   |
| DOAC or Therapeutic subc. or IV antithrombotic agent <24h        | 0.43            | 0.21, 0.89          | 0.021   |
| DOAC or Therapeutic subc. or IV antithrombotic agent 7d to >24h  | 1.31            | 0.87, 2.00          | 0.2     |
| <b>Surgical procedure</b>                                        |                 |                     |         |
| Major hip or pelvic surgery                                      | —               | —                   |         |
| Low risk surgeries                                               | 0.49            | 0.38, 0.64          | <0.001  |
| Thoracic aorta reconstruction                                    | 0.69            | 0.24, 2.03          | 0.5     |
| Aorta-iliac reconstruction                                       | 1.12            | 0.66, 1.95          | 0.7     |
| Peripheral vascular reconstruction without aortic cross-clamping | 0.68            | 0.43, 1.10          | 0.12    |
| Extracranial cerebrovascular surgery                             | 0.51            | 0.19, 1.40          | 0.2     |
| EVAR                                                             | 0.89            | 0.40, 2.06          | 0.8     |
| Complex visceral resection                                       | 0.46            | 0.32, 0.65          | <0.001  |
| Partial or total colectomy, or stomach surgery                   | 0.48            | 0.35, 0.64          | <0.001  |
| Other intra-abdominal surgery                                    | 0.37            | 0.26, 0.52          | <0.001  |

| Characteristic                                      | OR <sup>†</sup> | 95% CI <sup>†</sup> | p-value |
|-----------------------------------------------------|-----------------|---------------------|---------|
| Major head and neck resection for non-thyroid tumor | 1.18            | 0.68, 2.08          | 0.6     |
| Lobectomy                                           | 0.33            | 0.13, 0.82          | 0.016   |
| Other thoracic surgery                              | 0.76            | 0.35, 1.78          | 0.5     |
| Visceral resection                                  | 0.80            | 0.50, 1.28          | 0.3     |
| Cytoreductive surgery                               | 0.22            | 0.11, 0.45          | <0.001  |
| Hysterectomy                                        | 1.36            | 0.71, 2.81          | 0.4     |
| Radical hysterectomy                                | 0.86            | 0.31, 2.62          | 0.8     |
| Radical prostatectomy                               | 1.09            | 0.50, 2.53          | 0.8     |
| Transurethral prostatectomy                         | 0.99            | 0.49, 2.05          | >0.9    |
| Internal fixation of femur                          | 1.10            | 0.75, 1.62          | 0.6     |
| Knee arthroplasty                                   | 1.31            | 0.98, 1.74          | 0.067   |
| Above knee amputation                               | 0.64            | 0.35, 1.18          | 0.15    |
| Lower leg amputation                                | 0.68            | 0.36, 1.30          | 0.2     |
| Craniotomy                                          | 0.62            | 0.33, 1.15          | 0.12    |
| Major spine surgery                                 | 1.02            | 0.65, 1.59          | >0.9    |
| <b>Recruitment year</b>                             |                 |                     |         |
| 2009                                                | —               | —                   |         |

| Characteristic      | OR <sup>†</sup> | 95% CI <sup>†</sup> | p-value |
|---------------------|-----------------|---------------------|---------|
| 2007                | 0.14            | 0.01, 0.92          | 0.079   |
| 2008                | 1.03            | 0.79, 1.36          | 0.8     |
| 2010                | 1.37            | 1.05, 1.79          | 0.021   |
| 2011                | 1.30            | 0.94, 1.81          | 0.12    |
| 2012                | 1.02            | 0.75, 1.38          | >0.9    |
| 2013                | 1.18            | 0.86, 1.62          | 0.3     |
| 2014                | 1.28            | 0.79, 2.09          | 0.3     |
| 2015                | 0.27            | 0.10, 0.71          | 0.008   |
| 2016                | 1.53            | 0.06, 40.7          | 0.8     |
| <b>Study center</b> |                 |                     |         |
| 2                   | —               | —                   |         |
| 1                   | 0.69            | 0.36, 1.37          | 0.3     |
| 3                   | 0.25            | 0.15, 0.43          | <0.001  |
| 4                   | 1.67            | 0.90, 3.29          | 0.12    |
| 5                   | 0.27            | 0.18, 0.42          | <0.001  |
| 6                   | 1.49            | 0.88, 2.60          | 0.15    |
| 10                  | 0.39            | 0.28, 0.54          | <0.001  |

| Characteristic | OR <sup>†</sup> | 95% CI <sup>†</sup> | p-value |
|----------------|-----------------|---------------------|---------|
| 11             | 0.67            | 0.37, 1.25          | 0.2     |
| 21             | 0.19            | 0.12, 0.32          | <0.001  |
| 22             | 0.21            | 0.10, 0.44          | <0.001  |
| 31             | 0.84            | 0.44, 1.65          | 0.6     |
| 35             | 0.18            | 0.07, 0.45          | <0.001  |
| 40             | 0.31            | 0.21, 0.45          | <0.001  |
| 41             | 0.35            | 0.24, 0.51          | <0.001  |
| 42             | 0.22            | 0.14, 0.33          | <0.001  |
| 43             | 0.14            | 0.07, 0.27          | <0.001  |
| 45             | 0.52            | 0.21, 1.37          | 0.2     |
| 46             | 0.50            | 0.29, 0.90          | 0.020   |
| 49             | 0.20            | 0.11, 0.38          | <0.001  |
| 51             | 0.29            | 0.19, 0.44          | <0.001  |
| 52             | 0.38            | 0.25, 0.58          | <0.001  |
| 60             | 0.29            | 0.19, 0.47          | <0.001  |
| 80             | 0.23            | 0.14, 0.38          | <0.001  |
| 81             | 1.73            | 0.96, 3.30          | 0.079   |

| Characteristic | OR <sup>†</sup> | 95% CI <sup>†</sup> | p-value |
|----------------|-----------------|---------------------|---------|
| 82             | 2.69            | 1.42, 5.31          | 0.003   |
| 90             | 0.54            | 0.19, 1.64          | 0.3     |
| 92             | 0.61            | 0.37, 1.02          | 0.055   |

OR, odds ratio; CI, Confidence Interval; GFR, glomerular filtration rate; NSAID, nonsteroidal anti-inflammatory drug; COX-2, cyclooxygenase-2; BMI, body mass index; ASA, acetylsalicylic acid, SC AA, subcutaneous antithrombotic agent, DOAC, direct oral anticoagulant; EVAR, endovascular aneurysm repair

Study center 36 (n = 1) and pneumonectomy (n = 3) were excluded from the table due to low event counts. The OR, 95% CI and p-value for them is available from the corresponding author upon reasonable request.

BIMS (Bleeding Independently associated with Mortality after noncardiac Surgery) is defined as a composite of postoperative transfusion, postoperative hemoglobin < 70 and bleeding associated with reintervention.
