# Supplementary material for: Timing of Major Postoperative Bleeding Among Patients Undergoing Surgery
Source: PubMed Central journal article supplement (PMC10988355; doi:10.1001/jamanetworkopen.2024.4581), 2024-04-02
Supplement: jamanetwopen-e244581-s002.pdf [file jamanetwopen-e244581-s002.pdf]

\*First name, last name, and suffix (if applicable) are required and will appear in PubMed.

| <b>*Group Name(s): VISION investigators</b> |                   |                              |                  |             |                                          |                                                         |                                                                                            |
|---------------------------------------------|-------------------|------------------------------|------------------|-------------|------------------------------------------|---------------------------------------------------------|--------------------------------------------------------------------------------------------|
| <b>*First Name and Middle Initial(s)</b>    | <b>*Last Name</b> | <b>*Suffix (eg, Jr, III)</b> | Academic Degrees | Institution | Location (city, state/province, country) | Role or Contribution, eg, chair, principal investigator | Group (if more than 1 Group listed in the byline) and/or Subgroup (eg, Steering Committee) |
| Justin                                      | DeBeer            |                              |                  |             |                                          |                                                         |                                                                                            |
| Clive                                       | Kearon            |                              |                  |             |                                          |                                                         |                                                                                            |
| Richard                                     | Mizera            |                              |                  |             |                                          |                                                         |                                                                                            |
| Jehonathan                                  | Pinthus           |                              |                  |             |                                          |                                                         |                                                                                            |
| Sebastian                                   | Ribas             |                              |                  |             |                                          |                                                         |                                                                                            |
| Tej                                         | Sheth             |                              |                  |             |                                          |                                                         |                                                                                            |
| Marko                                       | Simunovic         |                              |                  |             |                                          |                                                         |                                                                                            |
| Vikas                                       | Tandon            |                              |                  |             |                                          |                                                         |                                                                                            |
| Tomas                                       | VanHelder         |                              |                  |             |                                          |                                                         |                                                                                            |
| Mitchell                                    | Winemaker         |                              |                  |             |                                          |                                                         |                                                                                            |
| James                                       | Paul              |                              |                  |             |                                          |                                                         |                                                                                            |
| Zubin                                       | Punthakee         |                              |                  |             |                                          |                                                         |                                                                                            |
| Karen                                       | Raymer            |                              |                  |             |                                          |                                                         |                                                                                            |
| Anthony                                     | Adili             |                              |                  |             |                                          |                                                         |                                                                                            |
| Catherine                                   | Clase             |                              |                  |             |                                          |                                                         |                                                                                            |
| Deborah                                     | Cook              |                              |                  |             |                                          |                                                         |                                                                                            |
| James                                       | Douketis          |                              |                  |             |                                          |                                                         |                                                                                            |
| Azim                                        | Gangji            |                              |                  |             |                                          |                                                         |                                                                                            |
| Paul                                        | Jackson           |                              |                  |             |                                          |                                                         |                                                                                            |
| Wendy                                       | Lim               |                              |                  |             |                                          |                                                         |                                                                                            |
| Peter                                       | Lovrics           |                              |                  |             |                                          |                                                         |                                                                                            |
| Sergio                                      | Mazzadi           |                              |                  |             |                                          |                                                         |                                                                                            |
| Maria                                       | Tiboni            |                              |                  |             |                                          |                                                         |                                                                                            |
| John                                        | Eikelboom         |                              |                  |             |                                          |                                                         |                                                                                            |
| Javier                                      | Ganame            |                              |                  |             |                                          |                                                         |                                                                                            |
| James                                       | Hankinson         |                              |                  |             |                                          |                                                         |                                                                                            |
| Stephen                                     | Hill              |                              |                  |             |                                          |                                                         |                                                                                            |
| Sanjit                                      | Jolly             |                              |                  |             |                                          |                                                         |                                                                                            |

Supplemental Online Content: Nonauthor Collaborators

\*First name, last name, and suffix (if applicable) are required and will appear in PubMed.

| *First Name and Middle Initial(s) | *Last Name | *Suffix (eg, Jr, III) | Academic Degrees | Institution | Location (city, state/province, country) | Role or Contribution, eg, chair, principal investigator | Group (if more than 1 Group listed in the byline) and/or Subgroup (eg, Steering Committee) |
|-----------------------------------|------------|-----------------------|------------------|-------------|------------------------------------------|---------------------------------------------------------|--------------------------------------------------------------------------------------------|
| Elizabeth                         | Ling       |                       |                  |             |                                          |                                                         |                                                                                            |
| Patrick                           | Magloire   |                       |                  |             |                                          |                                                         |                                                                                            |
| Guillaume                         | Pare       |                       |                  |             |                                          |                                                         |                                                                                            |
| David                             | Szalay     |                       |                  |             |                                          |                                                         |                                                                                            |
| Jacques                           | Tittley    |                       |                  |             |                                          |                                                         |                                                                                            |
| Omid                              | Salehian   |                       |                  |             |                                          |                                                         |                                                                                            |
| Hertzel                           | Gerstein   |                       |                  |             |                                          |                                                         |                                                                                            |
| Sadeesh K                         | Srinathan  |                       |                  |             |                                          |                                                         |                                                                                            |
| Clare                             | Ramsey     |                       |                  |             |                                          |                                                         |                                                                                            |
| Philip                            | St. John   |                       |                  |             |                                          |                                                         |                                                                                            |
| Laurel                            | Thorlacius |                       |                  |             |                                          |                                                         |                                                                                            |
| Faisal S                          | Siddiqui   |                       |                  |             |                                          |                                                         |                                                                                            |
| Hilary P                          | Grocott    |                       |                  |             |                                          |                                                         |                                                                                            |
| Andrew                            | McKay      |                       |                  |             |                                          |                                                         |                                                                                            |
| Trevor WR                         | Lee        |                       |                  |             |                                          |                                                         |                                                                                            |
| Ryan                              | Amadeo     |                       |                  |             |                                          |                                                         |                                                                                            |
| Duane                             | Funk       |                       |                  |             |                                          |                                                         |                                                                                            |
| Heather                           | McDonald   |                       |                  |             |                                          |                                                         |                                                                                            |
| James                             | Zacharias  |                       |                  |             |                                          |                                                         |                                                                                            |
| Rey                               | Acedillo   |                       |                  |             |                                          |                                                         |                                                                                            |
| Amit                              | Garg       |                       |                  |             |                                          |                                                         |                                                                                            |
| Ainslie                           | Hildebrand |                       |                  |             |                                          |                                                         |                                                                                            |
| Ngan                              | Lam        |                       |                  |             |                                          |                                                         |                                                                                            |
| Danielle                          | MacNeil    |                       |                  |             |                                          |                                                         |                                                                                            |
| Marko                             | Mrkobrada  |                       |                  |             |                                          |                                                         |                                                                                            |
| Pavel                             | Roshanov   |                       |                  |             |                                          |                                                         |                                                                                            |
| Daniel I                          | Sessler    |                       |                  |             |                                          |                                                         |                                                                                            |
| Andrea                            | Kurz       |                       |                  |             |                                          |                                                         |                                                                                            |
| Emre                              | Gorgun     |                       |                  |             |                                          |                                                         |                                                                                            |
| Amanda                            | Naylor     |                       |                  |             |                                          |                                                         |                                                                                            |

Supplemental Online Content: Nonauthor Collaborators

\*First name, last name, and suffix (if applicable) are required and will appear in PubMed.

| *First Name and Middle Initial(s) | *Last Name      | *Suffix (eg, Jr, III) | Academic Degrees | Institution | Location (city, state/province, country) | Role or Contribution, eg, chair, principal investigator | Group (if more than 1 Group listed in the byline) and/or Subgroup (eg, Steering Committee) |
|-----------------------------------|-----------------|-----------------------|------------------|-------------|------------------------------------------|---------------------------------------------------------|--------------------------------------------------------------------------------------------|
| Matt                              | Hutcherson      |                       |                  |             |                                          |                                                         |                                                                                            |
| Zhuo                              | Sun             |                       |                  |             |                                          |                                                         |                                                                                            |
| Bianka                            | Nguyen          |                       |                  |             |                                          |                                                         |                                                                                            |
| Michael                           | Palma           |                       |                  |             |                                          |                                                         |                                                                                            |
| Avis                              | Cuko            |                       |                  |             |                                          |                                                         |                                                                                            |
| Aram                              | Shahinyan       |                       |                  |             |                                          |                                                         |                                                                                            |
| Vinayak                           | Nadar           |                       |                  |             |                                          |                                                         |                                                                                            |
| Mauricio                          | Perilla         |                       |                  |             |                                          |                                                         |                                                                                            |
| Kamal                             | Maheshwari      |                       |                  |             |                                          |                                                         |                                                                                            |
| Alparslan                         | Turan           |                       |                  |             |                                          |                                                         |                                                                                            |
| Rupert                            | Pearse          |                       |                  |             |                                          |                                                         |                                                                                            |
| Edyta                             | Niebrzegowska   |                       |                  |             |                                          |                                                         |                                                                                            |
| Andrew                            | Wrag            |                       |                  |             |                                          |                                                         |                                                                                            |
| Andrew                            | Archbold        |                       |                  |             |                                          |                                                         |                                                                                            |
| Elisa                             | Kam             |                       |                  |             |                                          |                                                         |                                                                                            |
| Kirsty                            | Everingham      |                       |                  |             |                                          |                                                         |                                                                                            |
| Phoebe                            | Bodger          |                       |                  |             |                                          |                                                         |                                                                                            |
| Thais                             | Creary          |                       |                  |             |                                          |                                                         |                                                                                            |
| Ben                               | Bloom           |                       |                  |             |                                          |                                                         |                                                                                            |
| Alice                             | Carter          |                       |                  |             |                                          |                                                         |                                                                                            |
| Tom E F                           | Abbott          |                       |                  |             |                                          |                                                         |                                                                                            |
| Nirav                             | Shah            |                       |                  |             |                                          |                                                         |                                                                                            |
| Katarzyna                         | Mrozek          |                       |                  |             |                                          |                                                         |                                                                                            |
| Amy                               | Richardson      |                       |                  |             |                                          |                                                         |                                                                                            |
| Alex                              | Fowler          |                       |                  |             |                                          |                                                         |                                                                                            |
| Zakaria                           | Rob             |                       |                  |             |                                          |                                                         |                                                                                            |
| Gareth                            | Ackland         |                       |                  |             |                                          |                                                         |                                                                                            |
| Robert                            | Stephens        |                       |                  |             |                                          |                                                         |                                                                                            |
| Anna                              | Reyes           |                       |                  |             |                                          |                                                         |                                                                                            |
| Laura                             | Gallego Paredes |                       |                  |             |                                          |                                                         |                                                                                            |

Supplemental Online Content: Nonauthor Collaborators

\*First name, last name, and suffix (if applicable) are required and will appear in PubMed.

| *First Name and Middle Initial(s) | *Last Name           | *Suffix (eg, Jr, III) | Academic Degrees | Institution | Location (city, state/province, country) | Role or Contribution, eg, chair, principal investigator | Group (if more than 1 Group listed in the byline) and/or Subgroup (eg, Steering Committee) |
|-----------------------------------|----------------------|-----------------------|------------------|-------------|------------------------------------------|---------------------------------------------------------|--------------------------------------------------------------------------------------------|
| Pervez                            | Sultan               |                       |                  |             |                                          |                                                         |                                                                                            |
| David                             | Cain                 |                       |                  |             |                                          |                                                         |                                                                                            |
| John                              | Whittle              |                       |                  |             |                                          |                                                         |                                                                                            |
| Ana                               | Gutierrez del Arroyo |                       |                  |             |                                          |                                                         |                                                                                            |
| Shamir                            | Karmali              |                       |                  |             |                                          |                                                         |                                                                                            |
| C                                 | Williams             |                       |                  |             |                                          |                                                         |                                                                                            |
| A                                 | Rushton              |                       |                  |             |                                          |                                                         |                                                                                            |
| I                                 | Welters              |                       |                  |             |                                          |                                                         |                                                                                            |
| M                                 | Leuwer               |                       |                  |             |                                          |                                                         |                                                                                            |
| Jane                              | Parker               |                       |                  |             |                                          |                                                         |                                                                                            |
| Robert J                          | Sapsford             |                       |                  |             |                                          |                                                         |                                                                                            |
| Julian                            | Barth                |                       |                  |             |                                          |                                                         |                                                                                            |
| Julian                            | Scott                |                       |                  |             |                                          |                                                         |                                                                                            |
| Alistair                          | Hall                 |                       |                  |             |                                          |                                                         |                                                                                            |
| Simon                             | Howell               |                       |                  |             |                                          |                                                         |                                                                                            |
| Michaela                          | Lobley               |                       |                  |             |                                          |                                                         |                                                                                            |
| Janet                             | Woods                |                       |                  |             |                                          |                                                         |                                                                                            |
| Susannah                          | Howard               |                       |                  |             |                                          |                                                         |                                                                                            |
| Joanne                            | Fletcher             |                       |                  |             |                                          |                                                         |                                                                                            |
| Nikki                             | Dewhirst             |                       |                  |             |                                          |                                                         |                                                                                            |
| Wojciech                          | Szczeklik            |                       |                  |             |                                          |                                                         |                                                                                            |
| Jacek                             | Gorka                |                       |                  |             |                                          |                                                         |                                                                                            |
| Karolina                          | Gorka                |                       |                  |             |                                          |                                                         |                                                                                            |
| Bogusz                            | Kaczmarek            |                       |                  |             |                                          |                                                         |                                                                                            |
| Kamil                             | Polok                |                       |                  |             |                                          |                                                         |                                                                                            |
| Jolanta                           | Gasior               |                       |                  |             |                                          |                                                         |                                                                                            |
| Anna                              | Włodarczyk           |                       |                  |             |                                          |                                                         |                                                                                            |
| Magdalena                         | Duchińska            |                       |                  |             |                                          |                                                         |                                                                                            |
| Jakub                             | Fronczek             |                       |                  |             |                                          |                                                         |                                                                                            |
| Aleksandra                        | Wojnarska            |                       |                  |             |                                          |                                                         |                                                                                            |

Supplemental Online Content: Nonauthor Collaborators

\*First name, last name, and suffix (if applicable) are required and will appear in PubMed.

| *First Name and Middle Initial(s) | *Last Name    | *Suffix (eg, Jr, III) | Academic Degrees | Institution | Location (city, state/province, country) | Role or Contribution, eg, chair, principal investigator | Group (if more than 1 Group listed in the byline) and/or Subgroup (eg, Steering Committee) |
|-----------------------------------|---------------|-----------------------|------------------|-------------|------------------------------------------|---------------------------------------------------------|--------------------------------------------------------------------------------------------|
| Mateusz                           | Kozka         |                       |                  |             |                                          |                                                         |                                                                                            |
| Andrzej                           | Halek         |                       |                  |             |                                          |                                                         |                                                                                            |
| Pierre                            | Coriat        |                       |                  |             |                                          |                                                         |                                                                                            |
| Denis                             | Monneret      |                       |                  |             |                                          |                                                         |                                                                                            |
| Marie-Hélène                      | Fléron        |                       |                  |             |                                          |                                                         |                                                                                            |
| Jean Pierre                       | Goarin        |                       |                  |             |                                          |                                                         |                                                                                            |
| Cristina                          | Ibanez Esteve |                       |                  |             |                                          |                                                         |                                                                                            |
| Catherine                         | Royer         |                       |                  |             |                                          |                                                         |                                                                                            |
| Georges                           | Daas          |                       |                  |             |                                          |                                                         |                                                                                            |
| Valsa                             | Abraham       |                       |                  |             |                                          |                                                         |                                                                                            |
| Preetha                           | George        |                       |                  |             |                                          |                                                         |                                                                                            |
| Denis                             | Xavier        |                       |                  |             |                                          |                                                         |                                                                                            |
| Alben                             | Sigamani      |                       |                  |             |                                          |                                                         |                                                                                            |
| Atiya                             | Faruqui       |                       |                  |             |                                          |                                                         |                                                                                            |
| Radhika                           | Dhanpal       |                       |                  |             |                                          |                                                         |                                                                                            |
| Smitha                            | Almeida       |                       |                  |             |                                          |                                                         |                                                                                            |
| Joseph                            | Cherian       |                       |                  |             |                                          |                                                         |                                                                                            |
| Sultana                           | Furruqh       |                       |                  |             |                                          |                                                         |                                                                                            |
| CY                                | Wang          |                       |                  |             |                                          |                                                         |                                                                                            |
| GSY                               | Ong           |                       |                  |             |                                          |                                                         |                                                                                            |
| M                                 | Mansor        |                       |                  |             |                                          |                                                         |                                                                                            |
| Alvin SB                          | Tan           |                       |                  |             |                                          |                                                         |                                                                                            |
| II                                | Shariffuddin  |                       |                  |             |                                          |                                                         |                                                                                            |
| NHM                               | Hashim        |                       |                  |             |                                          |                                                         |                                                                                            |
| A Wahab                           | Undok         |                       |                  |             |                                          |                                                         |                                                                                            |
| HY                                | Lai           |                       |                  |             |                                          |                                                         |                                                                                            |
| WAW                               | Ahmad         |                       |                  |             |                                          |                                                         |                                                                                            |
| PS                                | Loh           |                       |                  |             |                                          |                                                         |                                                                                            |
| CY                                | Chong         |                       |                  |             |                                          |                                                         |                                                                                            |
| AHA                               | Razack        |                       |                  |             |                                          |                                                         |                                                                                            |

Supplemental Online Content: Nonauthor Collaborators

\*First name, last name, and suffix (if applicable) are required and will appear in PubMed.

| *First Name and Middle Initial(s) | *Last Name                | *Suffix (eg, Jr, III) | Academic Degrees | Institution | Location (city, state/province, country) | Role or Contribution, eg, chair, principal investigator | Group (if more than 1 Group listed in the byline) and/or Subgroup (eg, Steering Committee) |
|-----------------------------------|---------------------------|-----------------------|------------------|-------------|------------------------------------------|---------------------------------------------------------|--------------------------------------------------------------------------------------------|
| Matthew TV                        | Chan                      |                       |                  |             |                                          |                                                         |                                                                                            |
| Gordon YS                         | Choi                      |                       |                  |             |                                          |                                                         |                                                                                            |
| Lydia CW                          | Lit                       |                       |                  |             |                                          |                                                         |                                                                                            |
| Tony                              | Gin                       |                       |                  |             |                                          |                                                         |                                                                                            |
| Alex                              | Wan                       |                       |                  |             |                                          |                                                         |                                                                                            |
| Linda                             | Lai                       |                       |                  |             |                                          |                                                         |                                                                                            |
| Polly                             | Chan                      |                       |                  |             |                                          |                                                         |                                                                                            |
| German                            | Malaga                    |                       |                  |             |                                          |                                                         |                                                                                            |
| Vanessa                           | Valderrama-Victoria       |                       |                  |             |                                          |                                                         |                                                                                            |
| Javier D                          | Loza-Herrera              |                       |                  |             |                                          |                                                         |                                                                                            |
| Maria                             | De Los Angeles Lazo       |                       |                  |             |                                          |                                                         |                                                                                            |
| Aida                              | Rotta-Rotta               |                       |                  |             |                                          |                                                         |                                                                                            |
| Otavio                            | Berwanger                 |                       |                  |             |                                          |                                                         |                                                                                            |
| Erica                             | Suzumura                  |                       |                  |             |                                          |                                                         |                                                                                            |
| Eliana                            | Santucci                  |                       |                  |             |                                          |                                                         |                                                                                            |
| Katia                             | Leite                     |                       |                  |             |                                          |                                                         |                                                                                            |
| Jose                              | Amalth do Espirirto Santo |                       |                  |             |                                          |                                                         |                                                                                            |
| Cesar AP                          | Jardim                    |                       |                  |             |                                          |                                                         |                                                                                            |
| Alexandre                         | Biasi Cavalcanti          |                       |                  |             |                                          |                                                         |                                                                                            |
| Helio Penna                       | Guimaraes                 |                       |                  |             |                                          |                                                         |                                                                                            |
| Carisi A                          | Polanczyk                 |                       |                  |             |                                          |                                                         |                                                                                            |
| Mariana V                         | Furtado                   |                       |                  |             |                                          |                                                         |                                                                                            |
| Olga Lucía                        | Cortés                    |                       |                  |             |                                          |                                                         |                                                                                            |
| Félix R                           | Montes                    |                       |                  |             |                                          |                                                         |                                                                                            |
| Paula A                           | Alvarado                  |                       |                  |             |                                          |                                                         |                                                                                            |
| Juan Carlos                       | Villar                    |                       |                  |             |                                          |                                                         |                                                                                            |
| Skarlett                          | Vásquez                   |                       |                  |             |                                          |                                                         |                                                                                            |
| Bruce                             | Biccard                   |                       |                  |             |                                          |                                                         |                                                                                            |
| Hussein                           | Cassimjee                 |                       |                  |             |                                          |                                                         |                                                                                            |

Supplemental Online Content: Nonauthor Collaborators

\*First name, last name, and suffix (if applicable) are required and will appear in PubMed.

| <b>*First Name and Middle Initial(s)</b> | <b>*Last Name</b> | <b>*Suffix (eg, Jr, III)</b> | Academic Degrees | Institution | Location (city, state/province, country) | Role or Contribution, eg, chair, principal investigator | Group (if more than 1 Group listed in the byline) and/or Subgroup (eg, Steering Committee) |
|------------------------------------------|-------------------|------------------------------|------------------|-------------|------------------------------------------|---------------------------------------------------------|--------------------------------------------------------------------------------------------|
| Dean                                     | Gopalan           |                              |                  |             |                                          |                                                         |                                                                                            |
| Theroshnie                               | Kisten            |                              |                  |             |                                          |                                                         |                                                                                            |
| Aine                                     | Mugabi            |                              |                  |             |                                          |                                                         |                                                                                            |
| Prebashini                               | Naidoo            |                              |                  |             |                                          |                                                         |                                                                                            |
| Rubeshan                                 | Naidoo            |                              |                  |             |                                          |                                                         |                                                                                            |
| Reitze                                   | Rodseth           |                              |                  |             |                                          |                                                         |                                                                                            |
| David                                    | Skinner           |                              |                  |             |                                          |                                                         |                                                                                            |
| Alex                                     | Torborg           |                              |                  |             |                                          |                                                         |                                                                                            |
| Clara K                                  | Chow              |                              |                  |             |                                          |                                                         |                                                                                            |
| Graham S                                 | Hillis            |                              |                  |             |                                          |                                                         |                                                                                            |
| Richard                                  | Halliwell         |                              |                  |             |                                          |                                                         |                                                                                            |
| Stephen                                  | Li                |                              |                  |             |                                          |                                                         |                                                                                            |
| Vincent W                                | Lee               |                              |                  |             |                                          |                                                         |                                                                                            |
| John                                     | Mooney            |                              |                  |             |                                          |                                                         |                                                                                            |
