# Supplementary material for: Timing of Major Postoperative Bleeding Among Patients Undergoing Surgery
Source: PubMed Central journal article supplement (PMC10988355; doi:10.1001/jamanetworkopen.2024.4581), 2024-04-02
Supplement: jamanetwopen-e244581-s003.pdf [file jamanetwopen-e244581-s003.pdf]

## Data Sharing Statement

Halme. Timing of Major Postoperative Bleeding Among Patients Undergoing Surgery. *JAMA Netw Open*. Published April 02, 2024. doi:10.1001/jamanetworkopen.2024.4581

### Data

**Data available:** No

### Additional Information

**Explanation for why data not available:** The datasets generated during and/or analyzed during the current study are not publicly available but will be made available to journal statisticians as required.
